# Supplementary material for: Silicon-bridged bis(cyclohexadienyl) iron complexes: the first structurally characterised [14]ferrocenophaneElectronic supplementary information (ESI) available: experimental details and NMR spectroscopic data. See http://www.rsc.org/suppdata/cc/b1/b107874g/
Source: Royal Society of Chemistry journal article supplement (doi:10.1039/b107874g), 2001-11-26
Supplement: b107874g.doc [file b107874g.doc]

**SUPPLEMENTARY DETAILS**

**Silicon-bridged *bis*(cyclohexadienyl) iron complexes: The first structurally characterised [14]ferrocenophane**

Tony Hascall, Mark J. Drewitt and Dermot O'Hare*

*B107874G*

**General Considerations**

All manipulations were performed under an inert atmosphere of N2 using a combination of drybox and Schlenk techniques, except for handling of compounds **2** and **3**, which are stable to air. DMChK was synthesized following literature procedures.[[1]](#endnote-2) Satisfactory microanalytical data were obtained for compounds **1**, **2**, and **3** (C, H). All NMR data were recorded at 500 MHz (1H) and 125.7 MHz (13C) and quoted in ppm relative to tetramethlysilane (0 ppm). Coupling constants are given in Hz.

**Synthesis of Me2Si(DMChLi)2**

Me2SiCl2 (1.2 mL, 9.9 mmol) was diluted with pentane (20 mL) and the solution added dropwise to a suspension of DMChK (3.08 g, 21.1 mmol) in pentane (*ca.* 100 mL), resulting in an exothermic reaction. After stirring 1h, the yellow suspension had turned white. The reaction was filtered and the solvent removed from the filtrate under reduced pressure, yielding Me2Si(DMChH)2 as a colourless liquid [1H NMR (C6D6):  –0.10 (s, 6H, Si(CH3)2), 1.07 (s, 6H C(CH3)), 1.08 (s, 6H C(CH3)), 2.36 (m, 2H, C(H)Si), 5.43 (half of AB quartet, JH-H = 10, 4H, CH), 5.57 (d, JH-H = 3, half of AB quartet, JH-H = 10, 4H, CH); 13C NMR (C6D6):  –6.6 (s, Si(CH3)2), 29.6 (s, C(CH3)), 31.8 (s, C(CH3)), 31.9 (s, CH), 32.9 (s, C(CH3)2), 122.3 (s, CH), 133.4 (s, CH)]. The Me2Si(DMChH)2 was diluted with THF (*ca.* 100 mL) and the solution cooled to –78°. *t*-BuLi (12.0 mL of a 1.7 M solution in hexane, 20.4 mmol) was added dropwise. The resulting red solution was stirred for 1h at –78°, then allowed to return to room temperature and stirred for a further 45 mins. The solvent was removed under reduced pressure, giving a toffee-like substance that was dried under vacuum overnight. Addition of pentane (100 mL) gave a yellow suspension, which was filtered. The solid was washed with pentane (2 x *ca.* 50 mL) and dried under vacuum, giving Me2Si(DMChLi)2 as a lemon-yellow, highly air sensitive solid (2.44 g, 87% based on Me2SiCl2). 1H NMR (d8-THF):  –0.10 (s, 6H, Si(CH3)2), 0.75 (s, 12H C(CH3)2), 3.96 (d, JH-H = 8, 4H, CH), 5.96 (d, JH-H = 8, 4H, CH); 13C NMR (d8-THF):  –0.3 (s, Si(CH3)2), 30.5 (s, C(CH3)2), 31.6 (s, C(CH3)), 71.6 (s, C–Si), 92.6 (s, CH), 129.5 (s, CH).

**Synthesis of {[Me2Si(DMCh)2]Fe}n (n = 1, 2, 4), 1-3**

A solution of Me2Si(DMChLi)2 (1.31g, 4.61 mmol) in THF (*ca.* 30 mL) was added dropwise to a suspension of FeCl2•1.5THF (1.04 g, 4.43 mmol) in THF ( 50 mL) at –78°. The reaction was allowed to return to room temperature slowly and stirred overnight. The solvent was then removed under reduced pressure, and the residue extracted with pentane (100 mL + 50 mL). Removal of the solvent from the combined extracts gave a red solid, which was extracted with additional pentane (30 mL), giving a red solution of **1**, as well as orange solid consisting of the oligomers **2** and **3**. The pentane solution was concentrated to *ca.* 2 mL and stored at –80° overnight, leading to the formation of red crystals of [Me2Si(DMCh)2]Fe, **1**,(0.14 g, 10 %). The oligomers from above were recrystallised by dissolving in *ca.* 20 mL CH2Cl2 and cooling to –30°. This resulted in the formation of crystals of the dimer **2** (*ca.* 10 mg, 1%). Removal of the solvent from the supernatant afforded the tetramer **3** (*ca.* 10 mg, 1%).

NMR Data: **1**: 1H NMR (C6D6): 0.37 (s, 6H, Si(CH3)2), 0.38 (s, 6H, C6H4(CH3)2), 2.18 (s, 6H, C6H4(CH3)2), 2.66 (d, JH–H = 7, 4H, C6H4(CH3)2), 2.74 (d, JH–H = 7, 4H, C6H4(CH3)2); 13C NMR (C6D6): –4.1 (s, Si(CH3)2), 31.9 (s, C(CH3)2), 33.1 (s, C6H4(CH3)2), 34.9 (s, C6H4(CH3)2), 47.4 (s, C–Si), 53.6 (s, C-H), 85.4 (s, C-H).
**2**: 1H NMR (C6D6): 0.30 (s, 6H, Si-CH3), 0.33 (s, 12H, C6H4(CH3)), 0.34 (s, 6H, Si-CH3), 1.67 (s, 12H C6H4(CH3)), 2.97 (br, 8H, C6H4(CH3)2), 4.17 (d, JH–H = 6.5, 8H, C6H4(CH3)2); 13C NMR (C6D6): 30.1 (s, CH3), 33.2 (s, CH3), 33.9 (s, CH3), 51.1 (s, C-H), 86.1 (s, C-H), (quaternary carbons not observed due to poor solubility).
**3**: 1H NMR (C6D6): 0.21 (s, 12H, CH3), 0.32 (s, 12H, CH3), 0.45 (s, 12H, CH3), 0.75 (s, 12H, CH3), 1.08 (s, 12H, CH3), 1.22 (s, 12H, CH3), 1.24 (d, obscured, 4H, C6H4(CH3)2), 1.38 (d, JH–H = 7, 4H, C6H4(CH3)2), 3.95 (d, JH–H = 7, 4H, C6H4(CH3)2), 4.06 (d, JH–H = 7, 4H, C6H4(CH3)2), 4.61 (d, JH–H = 7, 4H, C6H4(CH3)2), 4.65 (d, JH–H = 7, 4H, C6H4(CH3)2)), 5.15 (d, JH–H = 7, 4H, C6H4(CH3)2), 5.35, (d, JH–H = 7, 4H, C6H4(CH3)2)

13C NMR (C6D6): –1.0 (s, Si-CH3), 0.3 (s, Si-CH3), 29.3 (s, C6H4(CH3)2), 29.5 (s, C6H4(CH3)2), 33.0 (s, C(CH3)2), 33.3 (s, C(CH3)2), 33.9 (s, C6H4(CH3)2), 35.3 (s, C6H4(CH3)2), 42.8 (s, C-H), 45.2 (s, C-H), 56.5 (2 s, C-H), 72.2 (s, C–Si), 78.6 (s, C–Si), 83.7 (s, C-H), 84.4 (s, C-H), 86.3 (s, C-H), 88.1 (s, C-H).

1. **References:**

   1 (a) P. T. Di Mauro and P. T. Wolczanski, *Organometallics***,** 1987, **6**, 1947.

   (b) P. T. Di Mauro and P. T. Wolczanski, *Polyhedron***,** 1995, **14**, 149. [↑](#endnote-ref-2)
